# Supplementary material
Source: Springer Nature journal article supplement (https://www.springermedizin.de/resource/supplementary/12958_2011_854_MOESM2_ESM.pdf/9569002)

**M****C****A**

Na/K-ATPase

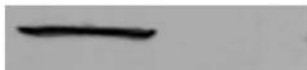

100kDa

**B**

GRP94

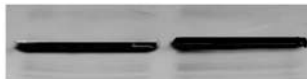

98kDa

**C**

Ku-86

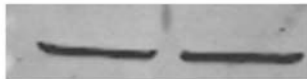

86kDa

**D**

GAPDH

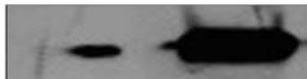

37kDa

Supplement: MOESM2 [file 9569002]
